# Supplementary material
Source: publisher figshare collection journal article supplement (https://sage.figshare.com/ndownloader/files/12370961)
Supplement: Supplementary file 1 [file 12370961]

## **Supplemental Material**

### **Study 1 questionnaires**

All questionnaires used in study 1 were in Hebrew. We present here the full questionnaires translated to English.

#### **Introductory Questionnaire**

Please enter your ID (this will be used as your subject number in the next questionnaires):

---

Please enter your gender

- ☐ Male
- ☐ Female

Please enter your age:

---

Please enter your mother tongue language:

- ☐ Hebrew
- ☐ Arabic
- ☐ English
- ☐ Russian
- ☐ Other: \_\_\_\_\_

Please enter your email, so that we can send you an invitation to download the application for participating in the experiment.

Your email will be used only for associating between the questionnaire data and your reports via the application.

Your email will be deleted from the final data.

---

For technical purposes of matching the application to your phone, please enter the type of your mobile phone:

- ☐ iPhone
- ☐ A mobile phone with an Android OS
- ☐ Other

### **End of Day Questionnaire**

Good evening,

Following is a summary questionnaire on daily emotions.

In this questionnaire, please refer to the way you felt **during the day**

Please enter you subject number:

\_\_\_\_\_

This questionnaire contains descriptions of different emotions

Please indicate **to what extent** you felt the following emotions **today**:

|              | 1 – a very<br>small<br>extent or<br>non at all | 2 – a small<br>extent | 3 - a<br>medium<br>extent | 4 - a large<br>extent | 5 - a very<br>large<br>extent |
|--------------|------------------------------------------------|-----------------------|---------------------------|-----------------------|-------------------------------|
| upset        | <input type="radio"/>                          | <input type="radio"/> | <input type="radio"/>     | <input type="radio"/> | <input type="radio"/>         |
| enthusiastic | <input type="radio"/>                          | <input type="radio"/> | <input type="radio"/>     | <input type="radio"/> | <input type="radio"/>         |
| proud        | <input type="radio"/>                          | <input type="radio"/> | <input type="radio"/>     | <input type="radio"/> | <input type="radio"/>         |
| nervous      | <input type="radio"/>                          | <input type="radio"/> | <input type="radio"/>     | <input type="radio"/> | <input type="radio"/>         |
| distressed   | <input type="radio"/>                          | <input type="radio"/> | <input type="radio"/>     | <input type="radio"/> | <input type="radio"/>         |
| active       | <input type="radio"/>                          | <input type="radio"/> | <input type="radio"/>     | <input type="radio"/> | <input type="radio"/>         |

This questionnaire contains descriptions of different emotions  
Please indicate **how frequently** you felt the following emotions **today**:

|              | 1 –very<br>infrequently<br>or not at all | 2 –<br>infrequently   | 3 -<br>a medium<br>frequency | 4 -<br>frequently     | 5 - very<br>frequently |
|--------------|------------------------------------------|-----------------------|------------------------------|-----------------------|------------------------|
| upset        | <input type="radio"/>                    | <input type="radio"/> | <input type="radio"/>        | <input type="radio"/> | <input type="radio"/>  |
| enthusiastic | <input type="radio"/>                    | <input type="radio"/> | <input type="radio"/>        | <input type="radio"/> | <input type="radio"/>  |
| proud        | <input type="radio"/>                    | <input type="radio"/> | <input type="radio"/>        | <input type="radio"/> | <input type="radio"/>  |
| nervous      | <input type="radio"/>                    | <input type="radio"/> | <input type="radio"/>        | <input type="radio"/> | <input type="radio"/>  |
| distressed   | <input type="radio"/>                    | <input type="radio"/> | <input type="radio"/>        | <input type="radio"/> | <input type="radio"/>  |
| active       | <input type="radio"/>                    | <input type="radio"/> | <input type="radio"/>        | <input type="radio"/> | <input type="radio"/>  |

### **End of Week Questionnaire**

Good evening,

Following is a summary questionnaire on weekly emotions.

In this questionnaire, please refer to the way you felt **during the week**

Please enter you subject number:

\_\_\_\_\_

This questionnaire contains descriptions of different emotions

Please indicate **to what extent** you felt the following emotions **this week**:

|              | 1 – a very<br>small<br>extent or<br>not at all | 2 – a small<br>extent | 3 - a<br>medium<br>extent | 4 - a large<br>extent | 5 - a very<br>large<br>extent |
|--------------|------------------------------------------------|-----------------------|---------------------------|-----------------------|-------------------------------|
| upset        | <input type="radio"/>                          | <input type="radio"/> | <input type="radio"/>     | <input type="radio"/> | <input type="radio"/>         |
| enthusiastic | <input type="radio"/>                          | <input type="radio"/> | <input type="radio"/>     | <input type="radio"/> | <input type="radio"/>         |
| proud        | <input type="radio"/>                          | <input type="radio"/> | <input type="radio"/>     | <input type="radio"/> | <input type="radio"/>         |
| nervous      | <input type="radio"/>                          | <input type="radio"/> | <input type="radio"/>     | <input type="radio"/> | <input type="radio"/>         |
| distressed   | <input type="radio"/>                          | <input type="radio"/> | <input type="radio"/>     | <input type="radio"/> | <input type="radio"/>         |
| active       | <input type="radio"/>                          | <input type="radio"/> | <input type="radio"/>     | <input type="radio"/> | <input type="radio"/>         |

This questionnaire contains descriptions of different emotions  
Please indicate **how frequently** you felt the following emotions **this week**:

|                  | 1 –very<br>infrequently<br>or not at all | 2 –<br>infrequently   | 3 –<br>a medium<br>frequency | 4 -<br>frequently     | 5 - very<br>frequently |
|------------------|------------------------------------------|-----------------------|------------------------------|-----------------------|------------------------|
| upset            | <input type="radio"/>                    | <input type="radio"/> | <input type="radio"/>        | <input type="radio"/> | <input type="radio"/>  |
| enthusias<br>tic | <input type="radio"/>                    | <input type="radio"/> | <input type="radio"/>        | <input type="radio"/> | <input type="radio"/>  |
| proud            | <input type="radio"/>                    | <input type="radio"/> | <input type="radio"/>        | <input type="radio"/> | <input type="radio"/>  |
| nervous          | <input type="radio"/>                    | <input type="radio"/> | <input type="radio"/>        | <input type="radio"/> | <input type="radio"/>  |
| distresse<br>d   | <input type="radio"/>                    | <input type="radio"/> | <input type="radio"/>        | <input type="radio"/> | <input type="radio"/>  |
| active           | <input type="radio"/>                    | <input type="radio"/> | <input type="radio"/>        | <input type="radio"/> | <input type="radio"/>  |

### **Momentary Survey**

To what extent do you feel at this moment - upset?

1 – a very small extent or not at all

☐☐☐☐

5 – a very large extent

☐

To what extent do you feel at this moment - enthusiastic?

1 – a very small extent or not at all

☐☐☐☐

5 – a very large extent

☐

To what extent do you feel at this moment - proud?

1 – a very small extent or not at all

☐☐☐☐

5 – a very large extent

☐

To what extent do you feel at this moment - nervous?

1 – a very small extent or not at all

☐☐☐☐

5 – a very large extent

☐

To what extent do you feel at this moment - distressed?

1 – a very small extent or not at all

☐☐☐☐

5 – a very large extent

☐

To what extent do you feel at this moment - active?

1 – a very small extent or not at all

☐☐☐☐

5 – a very large extent

☐

**Table S1: Descriptive statistics and correlations of daily and weekly affects (Study 1)**

|                          | Mean  | STD   | 1        | 2        | 3        | 4      | 5        | 6        | 7        |
|--------------------------|-------|-------|----------|----------|----------|--------|----------|----------|----------|
| 1 End day positive       | 2.425 | 0.844 |          |          |          |        |          |          |          |
| 2 Peak day positive      | 2.944 | 0.794 | 0.729*** |          |          |        |          |          |          |
| 3 Daily average positive | 2.377 | 0.639 | 0.773*** | 0.888*** |          |        |          |          |          |
| 4 Weekly positive        | 2.523 | 0.795 | 0.696*** | 0.747*** | 0.825*** |        |          |          |          |
| 5 End day negative       | 2.104 | 0.912 | -0.215** | -0.046   | -0.023   | -0.071 |          |          |          |
| 6 Peak day negative      | 2.933 | 0.901 | -0.048   | 0.079    | 0.039    | -0.013 | 0.655*** |          |          |
| 7 Daily average negative | 2.219 | 0.699 | -0.078   | -0.003   | -0.018   | -0.070 | 0.773*** | 0.883*** |          |
| 8 Weekly negative        | 2.594 | 0.958 | -0.143   | -0.002   | -0.061   | -0.144 | 0.669*** | 0.779*** | 0.820*** |

Note: \*\*\* p<.0001; \*\* p<.01; n=162

**Table S2a: Descriptive statistics and correlations of intensity variables (Study 1)**

|                                    | Mean  | STD   | 1        | 2        | 3        | 4      | 5        | 6        | 7        |
|------------------------------------|-------|-------|----------|----------|----------|--------|----------|----------|----------|
| 1 End day positive intensity       | 2.451 | 0.867 |          |          |          |        |          |          |          |
| 2 Peak day positive intensity      | 3.019 | 0.837 | 0.722*** |          |          |        |          |          |          |
| 3 Daily average positive intensity | 2.405 | 0.671 | 0.765*** | 0.884*** |          |        |          |          |          |
| 4 Weekly positive intensity        | 2.514 | 0.840 | 0.691*** | 0.742*** | 0.814*** |        |          |          |          |
| 5 End day negative intensity       | 2.134 | 0.945 | -0.168*  | -0.015   | 0.001    | -0.054 |          |          |          |
| 6 Peak day negative intensity      | 2.986 | 0.925 | 0.008    | 0.123    | 0.083    | 0.034  | 0.661*** |          |          |
| 7 Daily average negative intensity | 2.250 | 0.715 | -0.040   | 0.026    | 0.014    | -0.054 | 0.773*** | 0.864*** |          |
| 8 Weekly negative intensity        | 2.605 | 1.002 | -0.112   | 0.039    | -0.039   | -0.104 | 0.649*** | 0.735*** | 0.780*** |

Note: \*\*\* p<.0001; \* p<.05; n=162

**Table S2b: Descriptive statistics and correlations of frequency variables (Study1)**

|                                    | Mean  | STD   | 1        | 2        | 3        | 4       | 5        | 6        | 7        |
|------------------------------------|-------|-------|----------|----------|----------|---------|----------|----------|----------|
| 1 End day positive frequency       | 2.399 | 0.860 |          |          |          |         |          |          |          |
| 2 Peak day positive frequency      | 2.944 | 0.812 | 0.716*** |          |          |         |          |          |          |
| 3 Daily average positive frequency | 2.348 | 0.625 | 0.757*** | 0.891*** |          |         |          |          |          |
| 4 Weekly positive frequency        | 2.531 | 0.795 | 0.647*** | 0.708*** | 0.784*** |         |          |          |          |
| 5 End day negative frequency       | 2.074 | 0.923 | -0.223** | -0.045   | -0.040   | -0.071  |          |          |          |
| 6 Peak day negative frequency      | 2.928 | 0.934 | -0.086   | 0.082    | 0.021    | -0.063  | 0.628*** |          |          |
| 7 Daily average negative frequency | 2.189 | 0.700 | -0.093   | 0.014    | -0.022   | -0.069  | 0.749*** | 0.883*** |          |
| 8 Weekly negative frequency        | 2.582 | 0.966 | -0.162*  | 0.008    | -0.067   | -0.162* | 0.630*** | 0.764*** | 0.805*** |

Note: \*\*\* p<.0001; \*\* p<.01; \* p<.05; n=162



**Table S3a: Peak end models of positive and negative retrospective intensity evaluations (Study 1)**

|                      | Positive intensity |       |         | Negative intensity |       |         |
|----------------------|--------------------|-------|---------|--------------------|-------|---------|
|                      | b                  | sderr | $\beta$ | b                  | sderr | $\beta$ |
| <b>Daily average</b> | 0.786***           | 0.132 | 0.628   | 0.669***           | 0.160 | 0.478   |
| <b>End day</b>       | 0.152*             | 0.069 | 0.157   | 0.126              | 0.081 | 0.119   |
| <b>Peak day</b>      | 0.074              | 0.099 | 0.074   | 0.263*             | 0.104 | 0.243   |
| <b>R<sup>2</sup></b> |                    | 0.675 |         |                    | 0.629 |         |

Note: \*\*\* p<.0001; \*p<.05; n=162

**Table S3b: Peak end models of positive and negative retrospective frequency evaluations (Study 1)**

|                      | Positive frequency |       |         | Negative frequency |       |         |
|----------------------|--------------------|-------|---------|--------------------|-------|---------|
|                      | b                  | sderr | $\beta$ | b                  | sderr | $\beta$ |
| <b>Daily average</b> | 0.855***           | 0.148 | 0.672   | 0.717***           | 0.161 | 0.520   |
| <b>End day</b>       | 0.115 <sup>†</sup> | 0.070 | 0.124   | 0.086              | 0.073 | 0.082   |
| <b>Peak day</b>      | 0.020              | 0.107 | 0.020   | 0.262*             | 0.103 | 0.253   |
| <b>R<sup>2</sup></b> |                    | 0.622 |         |                    | 0.663 |         |

Note: \*\*\* p<.0001; \*p<.05; <sup>†</sup>p=.1; n=162

**Table S4: Peak-end daily to weekly models of positive and negative affect with no control for the daily average affect (Study 1)**

|                      | Positive affect |       |         | Negative affect |       |         |
|----------------------|-----------------|-------|---------|-----------------|-------|---------|
|                      | b               | sderr | $\beta$ | b               | sderr | $\beta$ |
| <b>End day</b>       | 0.304***        | 0.069 | 0.323   | 0.292***        | 0.065 | 0.278   |
| <b>Peak day</b>      | 0.512***        | 0.073 | 0.511   | 0.634***        | 0.066 | 0.596   |
| <b>R<sup>2</sup></b> | 0.606           |       |         | 0.651           |       |         |

Note: \*\*\* p<.0001; n=162

**Table S5: Descriptive statistics and inter-correlations (Study 2)**

|                                     | n    | Mean | STD  | 1     | 2     | 3     | 4     | 5    | 6    | 7    |
|-------------------------------------|------|------|------|-------|-------|-------|-------|------|------|------|
| 1. End day positive frequency       | 1814 | 2.74 | 0.81 |       |       |       |       |      |      |      |
| 2. Peak day positive frequency      | 1989 | 3.13 | 0.68 | 0.84  |       |       |       |      |      |      |
| 3. Daily average positive frequency | 1989 | 2.74 | 0.72 | 0.90  | 0.93  |       |       |      |      |      |
| 4. Weekly positive frequency        | 1813 | 2.77 | 0.70 | 0.86  | 0.84  | 0.91  |       |      |      |      |
| 5. End day negative frequency       | 1813 | 0.15 | 0.28 | -0.46 | -0.34 | -0.40 | -0.39 |      |      |      |
| 6. Peak day negative frequency      | 1989 | 0.44 | 0.45 | -0.45 | -0.39 | -0.50 | -0.48 | 0.66 |      |      |
| 7. Daily average negative frequency | 1989 | 0.19 | 0.26 | -0.49 | -0.46 | -0.52 | -0.52 | 0.76 | 0.89 |      |
| 8. Weekly negative frequency        | 1812 | 0.36 | 0.39 | -0.49 | -0.46 | -0.54 | -0.54 | 0.61 | 0.77 | 0.81 |

**Table S6: Peak-end daily to weekly models of positive and negative weekly frequency with no control for the daily average affect (Study 2)**

|                      | Positive affect |       |         | Negative affect |       |         |
|----------------------|-----------------|-------|---------|-----------------|-------|---------|
|                      | b               | sderr | $\beta$ | b               | sderr | $\beta$ |
| <b>End day</b>       | 0.521***        | 0.017 | 0.448   | 0.178***        | 0.027 | 0.248   |
| <b>Peak day</b>      | 0.406***        | 0.020 | 0.421   | 0.654***        | 0.017 | 0.581   |
| <b>R<sup>2</sup></b> |                 | .791  |         |                 | .612  |         |

Note: \*\*\* p<.0001; n=1812
